# Supplementary material
Source: PubMed Central journal article supplement (PMC5455613)
Supplement: Supp_Figure1.pdf [file Supp_Figure1.pdf]

## Supplementary Data

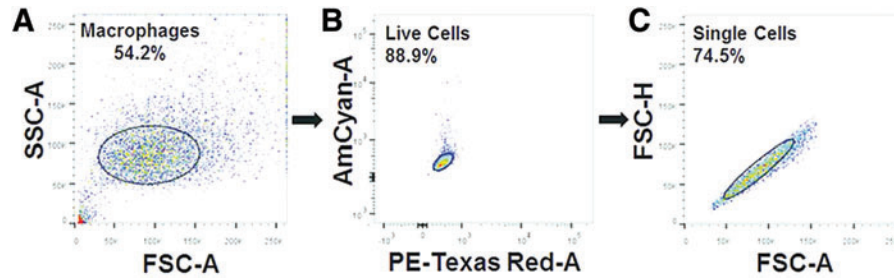

**SUPPLEMENTARY FIG. S1. Gating strategy for flow cytometry analysis.** (A) Macrophages were selected based on forward and side scatter. (B) Zombie Yellow™-negative (live) cells were selected and then (C) doublets were excluded. This cell population was then used for further analysis with specific fluorophores.
