# Supplementary material
Source: PubMed Central journal article supplement (PMC5455613)
Supplement: Supp_Figure2.pdf [file Supp_Figure2.pdf]

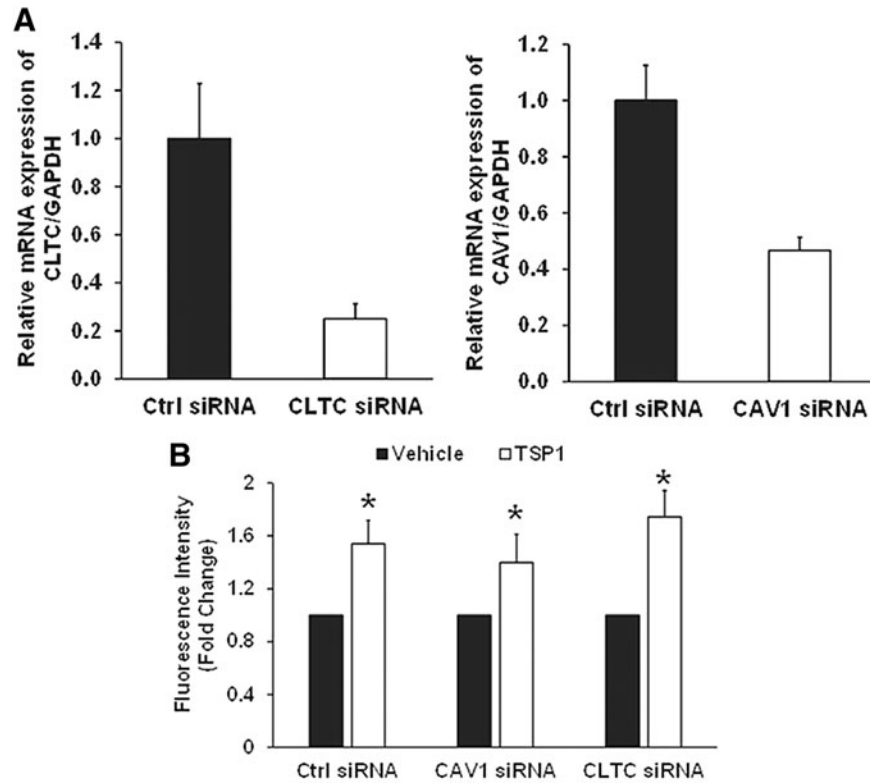

**SUPPLEMENTARY FIG. S2. Gene silencing of *CLTC* and *CAVI* does not inhibit TSP1-induced solute internalization by macrophages.** (A) Knockdown of *CLTC* and *CAVI* by siRNA was confirmed by RT-PCR. (B) siRNA-transfected macrophages were incubated with FITC-dextran, treated with vehicle or TSP1 (10 nM, 4 h), and FACS performed ( $n=3$ ). \* $p<0.05$  versus vehicle. Data represent the mean  $\pm$  SD. *CLTC*, clathrin heavy chain; FACS, fluorescence-activated cell sorting; RT-PCR, reverse transcription polymerase chain reaction; SD, standard deviation; TSP1, thrombospondin-1.
