# Supplementary material
Source: PubMed Central journal article supplement (PMC5455613)
Supplement: Supp_Figure3.pdf [file Supp_Figure3.pdf]

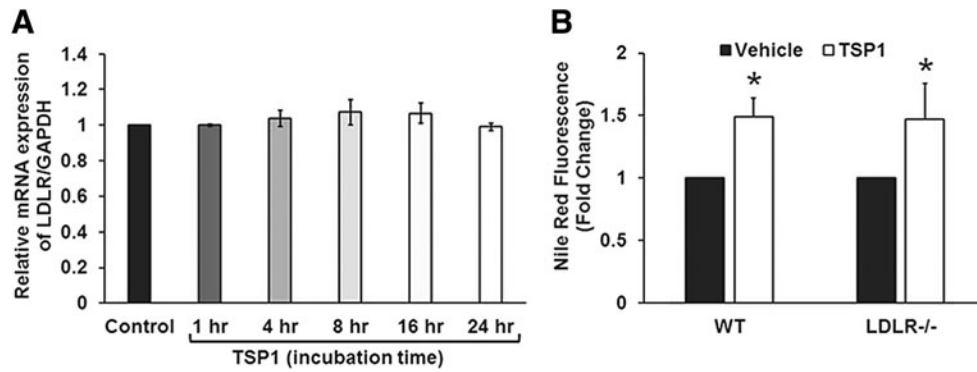

**SUPPLEMENTARY FIG. S3. TSP1-stimulated nLDL internalization is independent of LDLR.** (A) Macrophages were incubated with vehicle or TSP1 (10 nM) for 1, 4, 8, 16, or 24 h. LDLR mRNA expression was determined by RT-PCR. (B) WT and LDLR<sup>-/-</sup> macrophages were treated with vehicle or TSP1 in the presence of nLDL (250 μg/ml) for 24 h. Nile Red fluorescence was determined by FACS analysis (*n* = 3). Data represent the mean ± SD; \**p* < 0.05 versus vehicle. LDLR, low-density lipoprotein receptor; nLDL, native low-density lipoprotein; WT, wild-type.
