# Supplementary material
Source: PubMed Central journal article supplement (PMC5455613)
Supplement: Supp_Figure4.pdf [file Supp_Figure4.pdf]

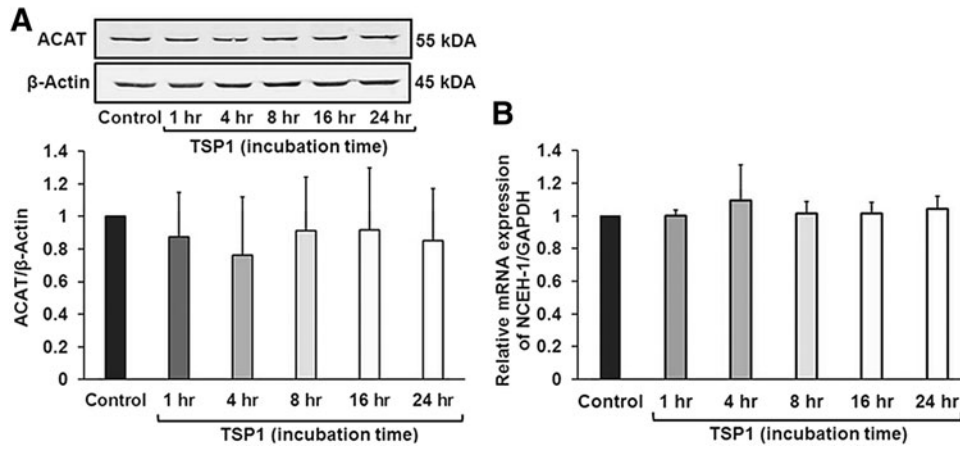

**SUPPLEMENTARY FIG. S4. TSP1 does not change ACAT and NCEH-1 expression in macrophages.** Macrophages were incubated with vehicle or TSP1 (10 nM) for 1, 4, 8, 16, or 24 h. ACAT protein (Abcam) (A) and NCEH-1 mRNA expression (Bio-Rad) (B) was determined by Western blot and RT-PCR, respectively ( $n=3$ ). Data represent the mean  $\pm$  SD. ACAT, acyl-CoA:cholesterol O-acyltransferase.
