# Supplementary material
Source: PubMed Central journal article supplement (PMC5455613)
Supplement: Supp_Figure5.pdf [file Supp_Figure5.pdf]

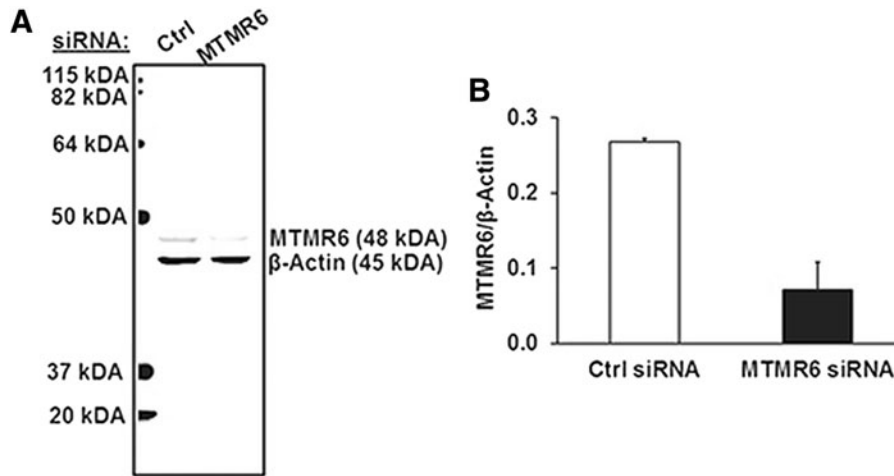

**SUPPLEMENTARY FIG. S5. Gene silencing of MTMR6.** (A, B) Knockdown of MTMR6 by siRNA was confirmed by Western blot (MTMR6 Antibody (N-14; Santa Cruz Biotechnology). Cells were used 48 h after transfection. MTMR6, myotubularin-related protein 6.
