# Supplementary material
Source: PubMed Central journal article supplement (PMC5455613)
Supplement: Supp_Figure6.pdf [file Supp_Figure6.pdf]

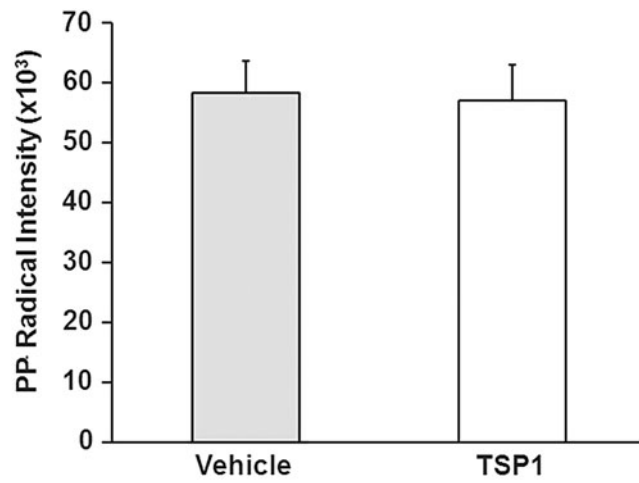

**SUPPLEMENTARY FIG. S6. TSP1 does not stimulate extracellular  $O_2^{\bullet-}$  generation in macrophages.** Macrophages were incubated with vehicle or TSP1 (10 nM) for 60 min. Extracellular  $O_2^{\bullet-}$  generation was detected by the membrane-impermeant EPR spin probe PPH ( $n=3$ ). EPR, electron paramagnetic resonance; PPH, 1-hydroxy-4-phosphono-oxy-2,2,6,6-tetramethyl-piperidine.
