# Supplementary material
Source: PubMed Central journal article supplement (PMC5455613)
Supplement: Supp_Figure7.pdf [file Supp_Figure7.pdf]

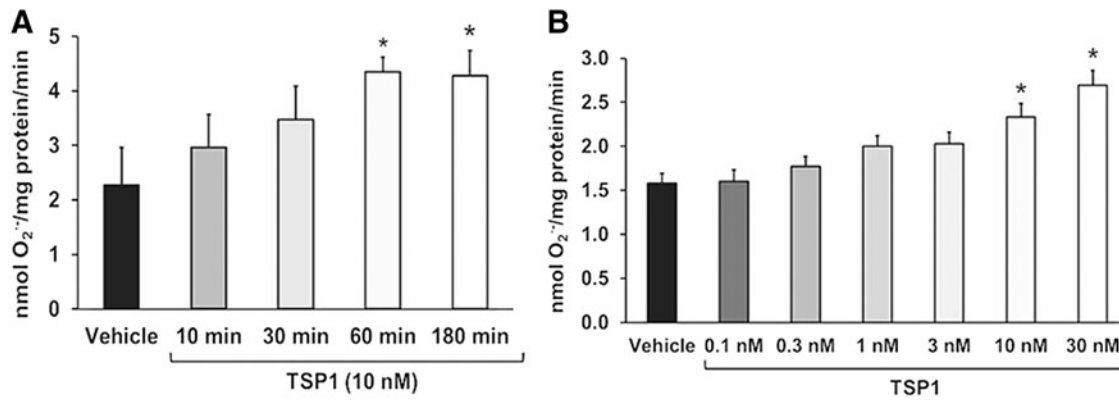

**SUPPLEMENTARY FIG. S7. TSP1 time- and concentration-dependently stimulates O<sub>2</sub><sup>-</sup> generation in macrophages.** (A) RAW 264.7 macrophages were incubated with vehicle (60 min) or 10 nM TSP1 for 10, 30, 60, and 180 min. Superoxide production was measured *via* cytochrome *c* reduction. \**p* < 0.05 *versus* vehicle (*n* = 3). (B) Macrophages were incubated with vehicle or TSP1 (0.1, 0.3, 1, 3, 10, or 30 nM) for 60 min. Superoxide production was measured *via* cytochrome *c* reduction. \**p* < 0.05 *versus* vehicle (*n* = 4–5).
