# Supplementary material
Source: PubMed Central journal article supplement (PMC5455613)
Supplement: Supp_Figure8.pdf [file Supp_Figure8.pdf]

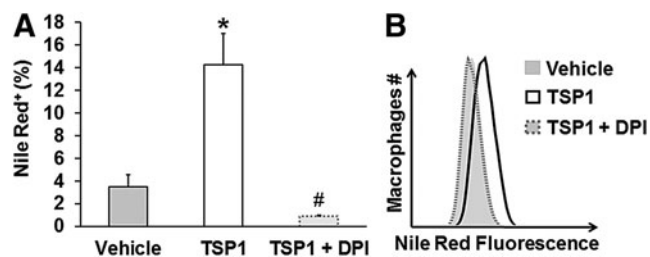

**SUPPLEMENTARY FIG. S8. Does NADPH oxidase play a role in TSP1-induced fluid-phase pinocytosis of nLDL?** (A) RAW 264.7 macrophages were treated with nLDL (250  $\mu$ g/ml) and vehicle or incubated with nLDL + TSP1 (10 nM) in the absence and presence of DPI (5  $\mu$ M, 15 min) for 24 h. Cells were fixed in 2% PFA, stained with Nile Red, and processed for FACS analysis. Bar graphs show the mean percentages of Nile Red-positive cells. \* $p$  < 0.05 indicates significant difference between vehicle *versus* TSP1. # $p$  < 0.05 indicates significant difference between TSP1 *versus* TSP1 + DPI ( $n$  = 3). (B) Representative FACS histogram plots are shown. DPI, diphenyleneiodonium.
