# Supplementary material
Source: PubMed Central journal article supplement (PMC5455613)
Supplement: Supp_Figure9.pdf [file Supp_Figure9.pdf]

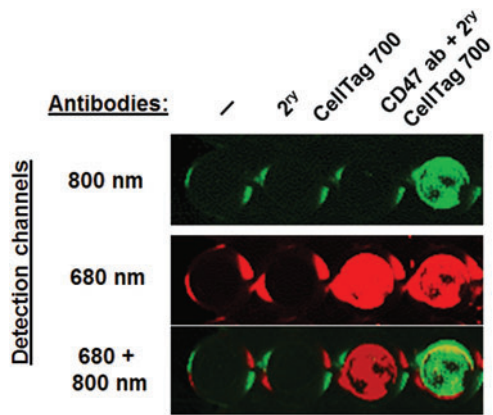

**SUPPLEMENTARY FIG. S9. CD47 expression in macrophages.** RAW 264.7 macrophages were incubated with a rabbit polyclonal antibody against CD47 (Abcam, Cambridge, MA) overnight at 4°C. This was followed by incubation with secondary antibody IRDye 800CW (*green*) and CellTag™ 700 (*red*) (1 h). Plates were scanned at 680 and 800 nm using the Odyssey CLx Infrared Imaging System.
