# Supplementary material
Source: PubMed Central journal article supplement (PMC5455613)
Supplement: Supp_Figure10.pdf [file Supp_Figure10.pdf]

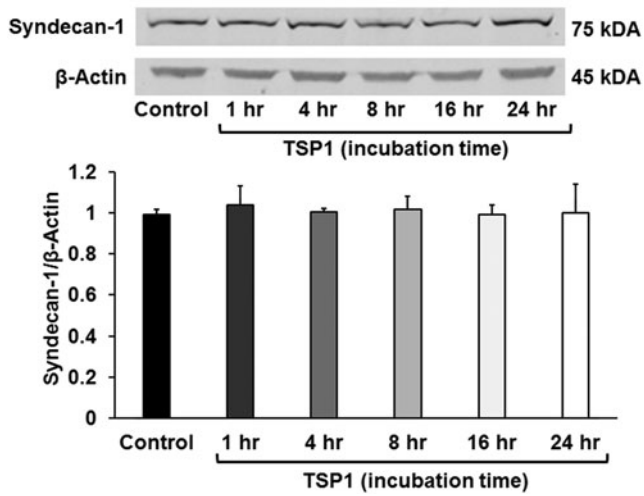

**SUPPLEMENTARY FIG. S10. TSP1 does not change syndecan-1 protein expression in macrophages.** Macrophages were incubated with vehicle or TSP1 (10 nM) for 1, 4, 8, 16, or 24 h. Syndecan-1 expression (Santa Cruz Biotechnology, clone H-174) was determined by Western blot ( $n=3$ ). Data represent the mean  $\pm$  SD.
