# Supplementary material
Source: PubMed Central journal article supplement (PMC5455613)
Supplement: Supp_Figure11.pdf [file Supp_Figure11.pdf]

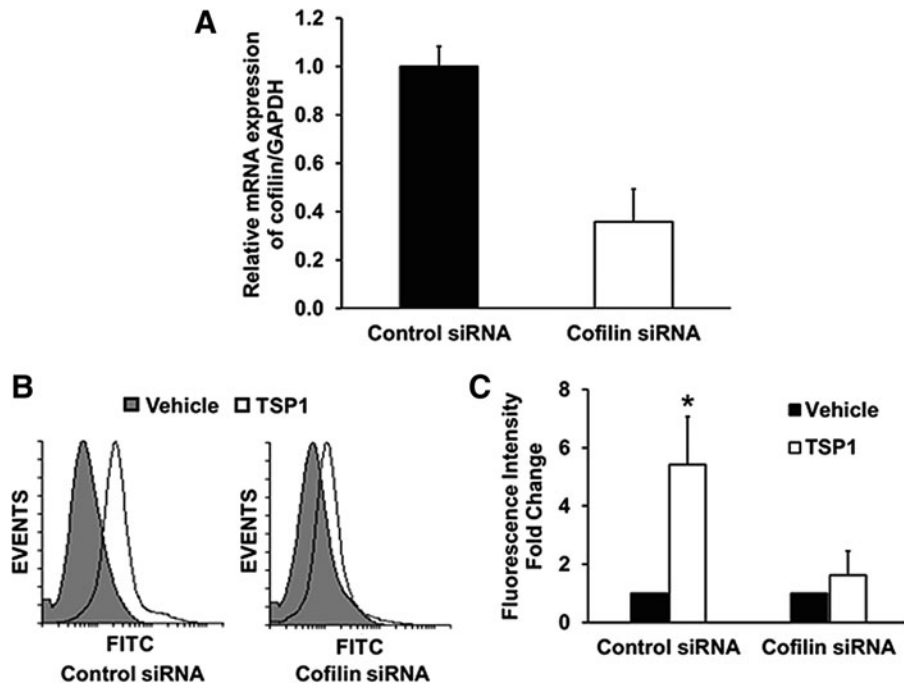

**SUPPLEMENTARY FIG. S11. Functional role of cofilin in TSP1-induced macropinocytosis.** (A) Gene silencing of cofilin. (B, C) Control and cofilin-silenced macrophages were incubated with FITC-dextran, treated with vehicle or TSP1 (10 nM, 4 h), and FACS performed ( $n=3$ ). \* $p < 0.05$  versus vehicle. Data represent the mean  $\pm$  SD.
