# Supplementary material
Source: PubMed Central journal article supplement (PMC5455613)
Supplement: Supp_Figure12.pdf [file Supp_Figure12.pdf]

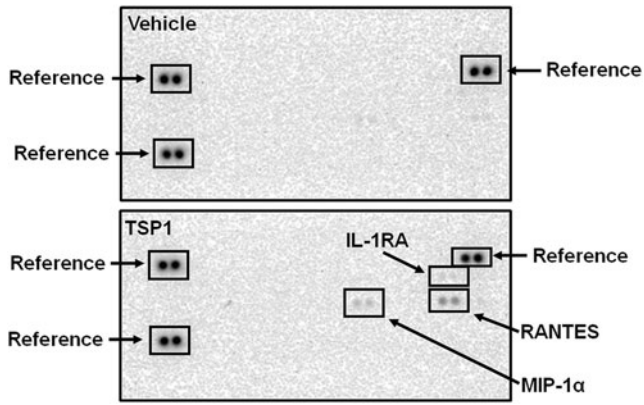

**SUPPLEMENTARY FIG. S12. TSP1 stimulates RANTES, interleukin-1 receptor antagonist (IL-1RA), and macrophage inflammatory protein-1 $\alpha$  (MIP-1 $\alpha$ ) secretion from macrophages.** Bone marrow-derived WT macrophages were treated with vehicle and TSP1 (10 nM, 2 h) and cytokine secretion into the media was determined using membrane-based sandwich immunoassay according to the manufacturer's instructions (R&D Systems). Representative membranes for vehicle and TSP1-treated macrophages are shown ( $n=2$ ).
