# Supplementary material
Source: PubMed Central journal article supplement (PMC5455613)
Supplement: Supp_Figure13.pdf [file Supp_Figure13.pdf]

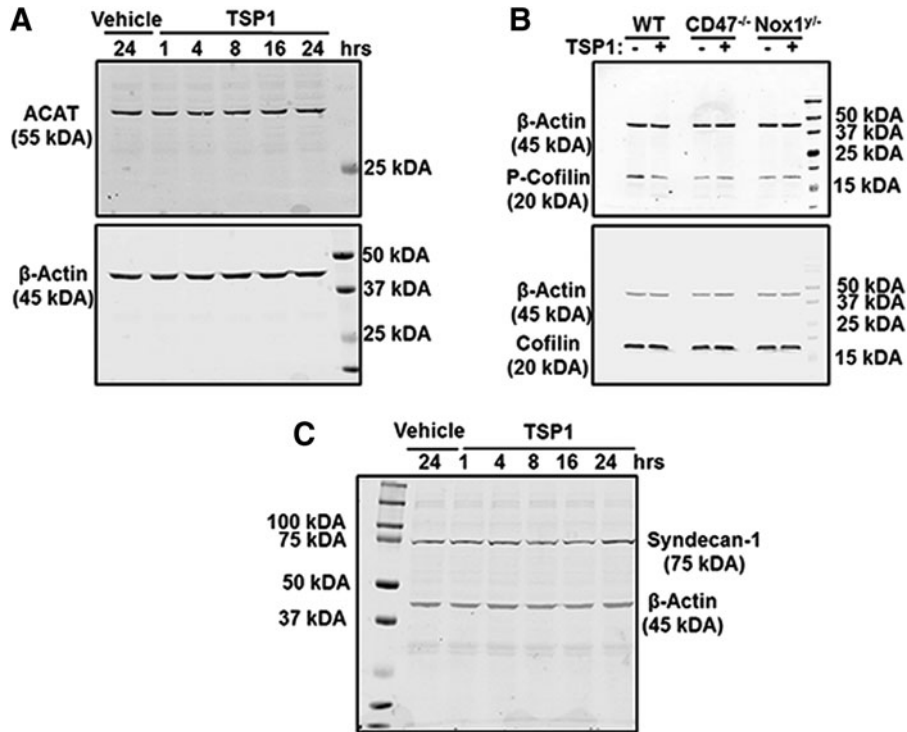

**SUPPLEMENTARY FIG. S13. Representative unedited Western blot images.** (A) RAW 264.7 macrophages were incubated with vehicle or TSP1 (10 nM) for 1, 4, 8, 16, or 24 h. ACAT protein expression was determined by Western blot. Representative of  $n=3$  experiments. (B) WT, Nox1<sup>+/+</sup>, and CD47<sup>-/-</sup> bone marrow-derived macrophages were incubated with vehicle or TSP1 and processed *via* Western blot for p-cofilin (Ser-3), total cofilin, and  $\beta$ -actin expression. Representative of  $n=3$  experiments. (C) Macrophages were treated as described in (A). Syndecan-1 expression was determined by Western blot. Representative of  $n=3$  experiments. Nox, NADPH oxidase.
